# Supplementary material for: Natural History and Treatment Strategies of Advanced PEComas: A Systematic Review
Source: MDPI journal article supplement (doi:10.3390/cancers13205227), 2021-10-18
Supplement: s1 [file s1]

# Natural History and Treatment Strategies of Advanced PEComas: A Systematic Review

Agathe Bourgmayer, Simon Nannini, Paul Bonjean, Jean-Emmanuel Kurtz, Gabriel G. Malouf and Justine Gantzer.

**Table S1.** List of the 124 reported cases of advanced PEComa-NOS and epithelioid angiomyolipomas.

| References                 | Publication Years | Age | Sex | Tumor size (cm) | Primary tumor location | Risk category (Folpe criteria) | Metastatic status | Treatment of local disease | Time before first mets (mos) | Metastatic sites  | 1st line metastatic treatment       | Time before progression (mos) | 2nd line metastatic treatment | Last known status | Follow-up (mos) |
|----------------------------|-------------------|-----|-----|-----------------|------------------------|--------------------------------|-------------------|----------------------------|------------------------------|-------------------|-------------------------------------|-------------------------------|-------------------------------|-------------------|-----------------|
| Bonetti <i>et al.</i> [91] | 2001              | 28  | F   | 9.0             | GI                     | -                              | Synch M+          | NA                         | NA                           | LN                | Debulking surgery<br>LN+            | 28                            | BSC                           | DOD               | 28              |
| Bonetti <i>et al.</i> [91] | 2001              | 19  | F   | 5.5             | Kidney                 | -                              | Synch M+          | NA                         | NA                           | LN                | Debulking surgery +<br>CT (AI) + RT | 10                            | BSC                           | DOD               | 18              |
| Bonetti <i>et al.</i> [91] | 2001              | 41  | F   | 6.0             | Kidney                 | -                              | Synch M+          | NA                         | NA                           | Ovary             | Surgery                             | CR                            | NA                            | Alive             | 6               |
| Dimmler <i>et al.</i> [20] | 2003              | 68  | F   | 4.0             | Uterus                 | Malignant                      | Meta M+           | Surgery                    | 84                           | Lung              | Wedge of 9<br>pulmonary mets        | CR                            | NA                            | Alive             | 96              |
| Folpe <i>et al.</i> [15]   | 2005              | 40  | M   | 22.0            | GI                     | Malignant                      | Meta M+           | Surgery                    | 24                           | Peritoneum;<br>LN | -                                   | -                             | -                             | Alive             | 24              |
| Folpe <i>et al.</i> [15]   | 2005              | 46  | F   | 12.0            | GI                     | Malignant                      | Meta M+           | Surgery +<br>CT            | 22                           | Peritoneum;<br>LN | -                                   | -                             | -                             | Alive             | 27              |
| Folpe <i>et al.</i> [15]   | 2005              | 59  | F   | 14.5            | Uterus                 | Malignant                      | Meta M+           | Surgery +<br>CT            | 30                           | Lung; Liver       | -                                   | -                             | -                             | Alive             | 30              |
| Folpe <i>et al.</i> [15]   | 2005              | 56  | F   | 9.0             | Uterus                 | Malignant                      | Meta M+           | Surgery,<br>RT + CT        | 11                           | Lung; Bones       | -                                   | -                             | -                             | Alive             | 11              |
| Folpe <i>et al.</i> [15]   | 2005              | 36  | F   | -               | Uterus                 | Malignant                      | Meta M+           | Surgery +<br>CT            | 12                           | Lung              | -                                   | 24                            | -                             | DOD               | 39              |
| Jeon <i>et al.</i> [21]    | 2005              | 9   | F   | 6.5             | Uterus                 | Malignant                      | Synch M+          | NA                         | NA                           | LN                | IVA 2 cy +<br>Surgery + 6           | CR                            | NA                            | Alive             | 34              |

|                             |      |    |   |      |                  |           |            |                                        |    |                          | cy IVA +<br>RT                              |    |                          |       |    |
|-----------------------------|------|----|---|------|------------------|-----------|------------|----------------------------------------|----|--------------------------|---------------------------------------------|----|--------------------------|-------|----|
| Fukunaga <i>et al.</i> [22] | 2005 | 40 | F | 30.0 | Uterus           | Malignant | Synch M+   | NA                                     | NA | Peritoneum               | Surgery +<br>CT + RT                        | 16 | -                        | DOD   | 16 |
| Evert <i>et al.</i> [23]    | 2005 | 56 | F | 8.0  | GI               | Malignant | Synch M+   | NA                                     | NA | Lung                     | Surgery of<br>the primary<br>location       | -  | -                        | Alive | -  |
| Yu <i>et al.</i> [24]       | 2005 | 12 | F | -    | Kidney           | Malignant | Synch M+   | NA                                     | NA | Lung; LN                 | CT                                          | -  | -                        | DOD   | 9  |
| Chen <i>et al.</i> [25]     | 2005 | 16 | F | 27.0 | GI               | Malignant | Synch M+   | NA                                     | NA | LN                       | Debulking<br>surgery +<br>CT                | 2  | -                        | Alive | 4  |
| Rigby <i>et al.</i> [26]    | 2005 | 11 | F | 10.5 | Kidney           | Malignant | Synch M+   | NA                                     | NA | LN;<br>Peritoneum        | Deticene,<br>Carmustine<br>,<br>Vincristine | 1  | Imatinib                 | DOD   | -  |
| Parfitt <i>et al.</i> [27]  | 2006 | 53 | F | 4.8  | Adrenal<br>Gland | -         | Synch M+   | NA                                     | NA | Lung                     | -                                           | -  | -                        | -     | -  |
| Armah <i>et al.</i> [28]    | 2007 | 59 | F | 6.0  | Uterus           | Malignant | Meta M+    | Surgery                                | 84 | Lung; Kidney             | Surgery of<br>all<br>localisations          | CR | NA                       | Alive | 15 |
| Park <i>et al.</i> [92]     | 2007 | 69 | M | 13.0 | Kidney           | Malignant | Meta M+    | Surgery                                | 8  | Liver;<br>Peritoneum     | -                                           | -  | -                        | Alive | 10 |
| Park <i>et al.</i> [92]     | 2007 | 46 | F | 17.0 | Kidney           | -         | Meta M+    | Surgery                                | 12 | LN; Liver;<br>Peritoneum | -                                           | -  | -                        | Alive | 16 |
| Osei <i>et al.</i> [29]     | 2007 | 49 | F | 5.3  | Soft Tissue      | Malignant | Meta M+    | RT + CT<br>(AI) +<br>Surgery           | 13 | Lung                     | Surgery of<br>lung mets                     | CR | -                        | Alive | 24 |
| El Jack <i>et al.</i> [30]  | 2007 | 38 | M | 13.0 | Kidney           | Benign    | Meta M+    | Surgery                                | 10 | Liver                    | Surgery                                     | 6  | -                        | Alive | 16 |
| Wagner <i>et al.</i> [31]   | 2010 | 65 | M | 20.0 | Retroperitoneum  | Malignant | Meta M+    | Surgery<br>(tumoral<br>effraction<br>) | 24 | Retroperitoneum          | Surgery                                     | 3  | MET I ><br>Sirolimus     | Alive | 52 |
| Wagner <i>et al.</i> [31]   | 2010 | 70 | M | 9.0  | Kidney           | Malignant | LA relapse | Surgery                                | 60 | Local relapse            | Surgery                                     | 12 | Sunitinib ><br>Sirolimus | Alive | -  |

|                              |      |    |   |      |                            |           |          |                       |     |                             |                                |    |                                        |       |     |
|------------------------------|------|----|---|------|----------------------------|-----------|----------|-----------------------|-----|-----------------------------|--------------------------------|----|----------------------------------------|-------|-----|
| Wagner <i>et al.</i> [31]    | 2010 | 61 | F | 9.0  | Uterus                     | Malignant | Synch M+ | NA                    | NA  | Lung                        | Sirolimus                      | 3  | Sirolimus > Sorafenib CT (AI) + mTOR I | DOD   | 8   |
| Italiano <i>et al.</i> [32]  | 2010 | 55 | F | -    | Uterus                     | -         | Meta M+  | Surgery               | 180 | Lung; Heart                 | Surgery                        | 9  | -                                      | Alive | -   |
| Italiano <i>et al.</i> [32]  | 2010 | 69 | F | -    | Uterus                     | -         | Meta M+  | Surgery               | -   | Lung                        | Temsirolimus + Surgery         | -  | -                                      | Alive | 9   |
| Yamashita <i>et al.</i> [94] | 2010 | 35 | M | -    | Bones                      | Malignant | Synch M+ | NA                    | NA  | Bones                       | RT-CT                          | 9  | BSC                                    | Alive | 12  |
| Yamashita <i>et al.</i> [94] | 2010 | 42 | F | -    | Uterus                     | Malignant | Meta M+  | Surgery               | 12  | Bones                       | Surgery of Bone mets + CT      | 10 | BSC                                    | DOD   | 22  |
| Subbiah <i>et al.</i> [33]   | 2010 | 58 | F | 17.0 | Retroperitoneum            | -         | Meta M+  | Surgery + CT (Anthra) | 24  | Liver                       | Hepatectomy + RT + CT (Anthra) | 24 | Topotecan + Temsirolimus + Bortezomib  | Alive | 52  |
| Argani <i>et al.</i> [93]    | 2010 | 40 | F | -    | Uterus                     | -         | Meta M+  | NA                    | NA  | Lung                        | -                              | -  | -                                      | -     | -   |
| Ross <i>et al.</i> [34]      | 2011 | 46 | F | -    | Large right broad ligament | Malignant | Meta M+  | Surgery               | 2   | Pelvis                      | Palliative RT                  | 10 | Sirolimus                              | Alive | 36  |
| Nese <i>et al.</i> [95]      | 2011 | 24 | F | -    | Kidney                     | Malignant | Synch M+ | NA                    | NA  | Liver; Pelvis               | -                              | -  | -                                      | DOD   | 12  |
| Nese <i>et al.</i> [95]      | 2011 | 29 | M | -    | Kidney                     | Malignant | Meta M+  | -                     | 18  | Lung; Liver                 | -                              | -  | -                                      | DOD   | 18  |
| Nese <i>et al.</i> [95]      | 2011 | 14 | M | 11.0 | Kidney                     | Malignant | Synch M+ | NA                    | NA  | LN                          | -                              | -  | -                                      | Alive | 240 |
| Nese <i>et al.</i> [95]      | 2011 | 59 | F | 34.0 | Kidney                     | Malignant | Synch M+ | NA                    | NA  | Colon                       | -                              | -  | -                                      | -     | -   |
| Nese <i>et al.</i> [95]      | 2011 | 25 | F | 8.0  | Kidney                     | Malignant | Synch M+ | NA                    | NA  | Lung; LN; Liver; Peritoneum | -                              | -  | -                                      | DOD   | 12  |
| Nese <i>et al.</i> [95]      | 2011 | 36 | M | 28.0 | Kidney                     | Malignant | Synch M+ | NA                    | NA  | Lung; Liver; Peritoneum     | -                              | -  | -                                      | DOD   | -   |
| Nese <i>et al.</i> [95]      | 2011 | 67 | M | 15.0 | Kidney                     | Malignant | Synch M+ | NA                    | NA  | LN                          | -                              | -  | -                                      | -     | -   |

|                             |      |    |   |      |                          |                               |          |           |     |                                |                                         |    |                       |       |     |
|-----------------------------|------|----|---|------|--------------------------|-------------------------------|----------|-----------|-----|--------------------------------|-----------------------------------------|----|-----------------------|-------|-----|
| Nese <i>et al.</i> [95]     | 2011 | 69 | M | 13.0 | Kidney                   | Malignant                     | Meta M+  | -         | 8   | LN; Liver                      | -                                       | -  | -                     | DOD   | 28  |
| Nese <i>et al.</i> [95]     | 2011 | 46 | F | 17.0 | Kidney                   | Malignant                     | Meta M+  | -         | 12  | Liver; Peritoneum              | -                                       | -  | -                     | Alive | 16  |
| Nese <i>et al.</i> [95]     | 2011 | 36 | M | 29.0 | Kidney                   | Malignant                     | Synch M+ | NA        | NA  | Lung; Liver                    | -                                       | -  | -                     | DOD   | 4   |
| Nese <i>et al.</i> [95]     | 2011 | 58 | M | 37.0 | Kidney                   | Malignant                     | Synch M+ | NA        | NA  | LN; Liver                      | -                                       | -  | -                     | DOD   | 24  |
| Nese <i>et al.</i> [95]     | 2011 | 27 | M | 11.0 | Kidney                   | Malignant                     | Synch M+ | NA        | NA  | LN                             | -                                       | -  | -                     | DOD   | 24  |
| Nese <i>et al.</i> [95]     | 2011 | 29 | M | 27.0 | Kidney                   | Malignant                     | Synch M+ | NA        | NA  | Liver                          | -                                       | -  | -                     | DOD   | 11  |
| Nese <i>et al.</i> [95]     | 2011 | 55 | F | 12.8 | Kidney                   | Malignant                     | Synch M+ | NA        | NA  | LN                             | -                                       | -  | -                     | DOD   | 12  |
| Nese <i>et al.</i> [95]     | 2011 | 57 | M | 4.5  | Kidney                   | Benign                        | Meta M+  | -         | 58  | LN                             | -                                       | -  | -                     | Alive | 58  |
| Gennatas <i>et al.</i> [35] | 2012 | 63 | F | -    | Retroperitoneum          | -                             | Meta M+  | Surgery   | 12  | Local relapse; Retroperitoneum | Surgery                                 | 4  | Imatinib > Everolimus | Alive | 37  |
| Kazzaz <i>et al.</i> [36]   | 2012 | 26 | M | -    | Bones                    | Uncertain malignant potential | Synch M+ | NA        | NA  | Lung; Bones                    | Palliative surgery                      | 5  | -                     | -     | -   |
| Desy <i>et al.</i> [37]     | 2012 | 29 | M | 5.0  | Bones                    | Malignant                     | Meta M+  | Surgery   | 2   | Lung                           | Temsirolimus                            | 8  | BSC                   | DOD   | 10  |
| Niu <i>et al.</i> [38]      | 2012 | 33 | F | -    | Cardiac                  | Malignant                     | Meta M+  | Surgery   | 8   | Local relapse                  | Surgery + RT                            | 24 | mTOR I                | Alive | 33  |
| Alaggio <i>et al.</i> [39]  | 2012 | 2  | F | 12.0 | Right umbilical ligament | Malignant                     | Synch M+ | NA        | NA  | Peritoneum                     | IVA 2 cy + Surgery + 4 cy of Adriamycin | 6  | Imatinib              | Alive | 72  |
| Shen <i>et al.</i> [40]     | 2013 | 60 | F | 14.0 | Liver                    | Uncertain malignant potential | Meta M+  | Surgery   | 108 | Lung; Liver; Bladder; Pancreas | Surgery                                 | -  | -                     | Alive | 120 |
| Dickson <i>et al.</i> [96]  | 2013 | 24 | F | 25.0 | Retroperitoneum          | -                             | LA       | Sirolimus | NA  | NA                             | NA                                      | CR | NA                    | Alive | 22  |

|                               |      |    |   |      |                 |           |          |                            |    |                                   |                           |    |                               |       |     |
|-------------------------------|------|----|---|------|-----------------|-----------|----------|----------------------------|----|-----------------------------------|---------------------------|----|-------------------------------|-------|-----|
| Dickson <i>et al.</i> [96]    | 2013 | 40 | F | 6.0  | Retroperitoneum | -         | Synch M+ | NA                         | NA | NA                                | NA                        | CR | NA                            | Alive | 16  |
| Dickson <i>et al.</i> [96]    | 2013 | 57 | M | 10.5 | GI              | -         | Meta M+  | Surgery                    | 10 | Peritoneum                        | -                         | -  | -                             | Alive | 14  |
| Dickson <i>et al.</i> [96]    | 2013 | 37 | F | -    | Liver           | -         | LA       | 2 mos Everolimus + Surgery | -  | Local relapse                     | Surgery                   | CR | NA                            | Alive | 6   |
| Dickson <i>et al.</i> [96]    | 2013 | 65 | M | -    | Adrenal Gland   | -         | Synch M+ | NA                         | NA | Lung; Soft tissue                 | Sirolimus                 | -  | Sorafenib > mTOR I            | DOD   | 36  |
| Scheppach <i>et al.</i> [41]  | 2013 | 23 | M | 5.5  | GI              | Malignant | Synch M+ | NA                         | NA | LN; Liver                         | Surgery + Sirolimus       | 4  | Surgery + CT (AI)             | DOD   | 23  |
| Wyluda <i>et al.</i> [42]     | 2013 | 31 | F | -    | Kidney          | Malignant | Meta M+  | Surgery                    | 84 | Lung; LN; Liver; Pancreas; Uterus | Temsirolimus              | -  | -                             | DOD   | 5   |
| Fu <i>et al.</i> [43]         | 2013 | 38 | F | 9.9  | GI              | Malignant | LA       | Surgery + CT (IVA)         | NA | NA                                | NA                        | CR | NA                            | Alive | 6   |
| Williamson <i>et al.</i> [44] | 2013 | 55 | F | 5.0  | Bladder         | Malignant | Meta M+  | Surgery                    | 10 | Peritoneum                        | CT                        | -  | -                             | DOD   | 12  |
| Le <i>et al.</i> [45]         | 2014 | 54 | F | 18.0 | Retroperitoneum | -         | Synch M+ | NA                         | NA | Lung                              | Wedge of 3 pulmonary mets | 25 | CT (Anthrax) + RT > Sirolimus | Alive | 76  |
| Shi <i>et al.</i> [46]        | 2014 | 48 | M | 14.0 | Kidney          | Malignant | Synch M+ | NA                         | NA | Lung                              | Surgery                   | CR | NA                            | Alive | 148 |
| Cossu <i>et al.</i> [47]      | 2014 | 52 | F | -    | Uterus          | Malignant | Meta M+  | Surgery                    | 36 | Lung; Liver                       | BSC                       | NA | NA                            | DOD   | 60  |
| Ghosh <i>et al.</i> [48]      | 2014 | 57 | F | -    | Uterus          | Malignant | Meta M+  | Surgery                    | 84 | LN; Pleural; Pelvis               | Temsirolimus > Sirolimus  | 8  | BSC                           | DOD   | 10  |
| Bergamo <i>et al.</i> [49]    | 2014 | 31 | F | -    | Liver           | Malignant | LA       | Everolimus 6 mos + Surgery | NA | NA                                | NA                        | CR | NA                            | Alive | 12  |

|                                     |      |    |   |      |             |           |          |                                                             |    |                            |                                    |    |                     |       |    |
|-------------------------------------|------|----|---|------|-------------|-----------|----------|-------------------------------------------------------------|----|----------------------------|------------------------------------|----|---------------------|-------|----|
| Kapur <i>et al.</i> [50]            | 2014 | 49 | F | 13.5 | GI          | Malignant | Synch M+ | NA                                                          | NA | Liver; Peritoneum          | Palliative surgery + Sirolimus     | -  | -                   | Alive | -  |
| Palleschi <i>et al.</i> [51]        | 2014 | 65 | M | 2.5  | Bladder     | Malignant | Synch M+ | NA                                                          | NA | Bones                      | Surgery of primary mass + CT (Gem) | -  | -                   | Alive | 7  |
| Sbrollini <i>et al.</i> [52]        | 2014 | 53 | M | 2.4  | Prostate    | Malignant | Synch M+ | NA                                                          | NA | Lung                       | Surgery                            | 4  | Gemcitabine         | Alive | 6  |
| Bunch <i>et al.</i> [53]            | 2014 | 19 | F | 8.0  | Uterus      | Malignant | LA       | Debulking surgery + Temsirolimus + resection remaining mass | NA | NA                         | NA                                 | CR | NA                  | Alive | 15 |
| Russel <i>et al.</i> [54]           | 2014 | 27 | F | 4.2  | Bladder     | -         | Meta M+  | Surgery                                                     | 1  | Peritoneum                 | Surgery                            | 6  | Surgery             | Alive | -  |
| Lao <i>et al.</i> [55]              | 2015 | 47 | M | 5.2  | Bones       | Malignant | Synch M+ | NA                                                          | NA | Lung                       | Palliative RT + CT                 | -  | -                   | Alive | 42 |
| Neofytou <i>et al.</i> [56]         | 2015 | 24 | F | 3.0  | Kidney      | -         | Synch M+ | NA                                                          | NA | Liver                      | Surgery                            | CR | NA                  | Alive | 12 |
| Schoolmeester <i>et al.</i> [57]    | 2015 | 53 | F | 17.0 | Uterus      | Malignant | Meta M+  | Surgery                                                     | 2  | Peritoneum                 | Surgery + Cisplatin-based CT       | 11 | Surgery + Sirolimus | Alive | 13 |
| Schoolmeester <i>et al.</i> [57] JK | 2015 | 47 | F | 8.0  | Pelvic wall | Malignant | Meta M+  | Surgery                                                     | 15 | Other                      | Surgery                            | CR | NA                  | Alive | 57 |
| Schoolmeester <i>et al.</i> [57]    | 2015 | 66 | F | -    | Uterus      | Malignant | Meta M+  | Surgery                                                     | NA | Lung                       | Surgery                            | CR | NA                  | Alive | 1  |
| Sun <i>et al.</i> [58]              | 2015 | 46 | F | -    | Uterus      | -         | Meta M+  | Surgery                                                     | 24 | Lung; Kidney               | Surgery                            | 1  | mTOR I              | Alive | 7  |
| Liang <i>et al.</i> [59]            | 2015 | 63 | M | 9.8  | Mediastinal | Malignant | Meta M+  | Surgery                                                     | 3  | Bones; Mediastinal relapse | CT                                 | -  | -                   | DOD   | 7  |
| Fitzpatrick <i>et al.</i> [60]      | 2016 | 61 | F | 10.7 | Uterus      | Malignant | Synch M+ | NA                                                          | NA | Ovary                      | Surgery                            | CR | -                   | Alive | 6  |

|                               |      |    |   |      |             |                               |            |                        |     |                                          |                                 |    |                       |       |     |
|-------------------------------|------|----|---|------|-------------|-------------------------------|------------|------------------------|-----|------------------------------------------|---------------------------------|----|-----------------------|-------|-----|
| Batereau <i>et al.</i> [61]   | 2016 | 26 | F | -    | GI          | Malignant                     | Meta M+    | Surgery                | 84  | Peritoneum                               | Surgery                         | 24 | Surgery + RT          | Alive | 168 |
| Batereau <i>et al.</i> [61]   | 2016 | 49 | F | 10.0 | Soft Tissue | Malignant                     | LA         | Sirolimus              | -   | NA                                       | NA                              | CR | NA                    | Alive | 24  |
| Starbuck <i>et al.</i> [62]   | 2016 | 30 | F | 26.8 | Uterus      | -                             | Meta M+    | Surgery + CT (Gem+T)   | 3   | Bones; Pelvic mets                       | Temsirolimus > Sirolimus        | -  | -                     | Alive | 36  |
| Starbuck <i>et al.</i> [62]   | 2016 | 43 | F | -    | Uterus      | -                             | LA         | Surgery + Temsirolimus | -   | Local relapse                            | Surgery                         | CR | NA                    | Alive | 18  |
| Starbuck <i>et al.</i> [62]   | 2016 | 64 | F | -    | Uterus      | -                             | Meta M+    | Surgery + CT (Gem+T)   | 10  | Peritoneum                               | Surgery + Temsirolimus          | 3  | BSC                   | DOD   | 17  |
| Gao <i>et al.</i> [63]        | 2016 | 47 | F | -    | Uterus      | Malignant                     | Synch M+   | NA                     | NA  | Lung; Kidney                             | Surgery                         | 1  | Sirolimus + Sorafenib | Alive | 11  |
| Flechter <i>et al.</i> [64]   | 2016 | 32 | F | -    | GI          | -                             | Synch M+   | NA                     | NA  | Lung; Brain                              | Everolimus + brain surgery      | 18 | Doxorubicin           | DOD   | 50  |
| Yoo Bee <i>et al.</i> [65]    | 2016 | 48 | F | -    | Ovary       | -                             | Synch M+   | NA                     | NA  | Lung                                     | Surgery                         | -  | -                     | Alive | 1   |
| Karpathiou <i>et al.</i> [66] | 2017 | 25 | F | 8.0  | Bones       | Uncertain malignant potential | Meta M+    | Surgery + Temsirolimus | 72  | Lung; LN; Retroperitoneum; Local relapse | CT (Anthra)                     | 6  | -                     | Alive | 96  |
| Okamoto <i>et al.</i> [67]    | 2017 | 44 | F | 6.9  | Uterus      | -                             | Meta M+    | Surgery                | 36  | Lung                                     | Surgery                         | -  | -                     | Alive | 60  |
| Machado <i>et al.</i> [68]    | 2017 | 33 | F | 10.0 | GI          | Malignant                     | Synch M+   | NA                     | NA  | Liver; Peritoneum                        | Emergency surgery + CT (Anthra) | 3  | HD-I > mTOR I         | DOD   | 30  |
| Kwon <i>et al.</i> [69]       | 2017 | 62 | F | 5.5  | Uterus      | Malignant                     | Synch M+   | NA                     | NA  | Lung; Lower vagina; Bones                | Everolimus                      | -  | -                     | Alive | 18  |
| Kwon <i>et al.</i> [69]       | 2017 | 38 | F | 4.6  | Uterus      | -                             | Synch M+   | NA                     | NA  | LN                                       | Surgery                         | CR | NA                    | Alive | 8   |
| Varan <i>et al.</i> [70]      | 2017 | 7  | M | 3.4  | Orbital     | Malignant                     | LA relapse | Sirolimus              | 0.8 | Local relapse                            | IVA                             | -  | -                     | Alive | 12  |
| Raimondi <i>et al.</i> [71]   | 2018 | 61 | M | -    | Kidney      | Malignant                     | Meta M+    | Surgery                | 84  | Lung                                     | Sirolimus                       | -  | -                     | Alive | 128 |

|                                         |      |    |   |      |                 |                               |            |                       |    |                            |                                                                                    |    |                        |               |     |
|-----------------------------------------|------|----|---|------|-----------------|-------------------------------|------------|-----------------------|----|----------------------------|------------------------------------------------------------------------------------|----|------------------------|---------------|-----|
| Lin <i>et al.</i> [72]                  | 2018 | 28 | M | 8.9  | GI              | Malignant                     | Synch M+   | NA                    | NA | LN                         | Surgery                                                                            | 49 | Surgery                | Alive         | 120 |
| Hul'ova <i>et al.</i> [73]              | 2018 | 28 | F | 15.0 | Kidney          | Malignant                     | Meta M+    | Surgery               | 15 | Peritoneum                 | Sunitinib (misdiagnosed as chromophobic renal carcinoma)<br>Surgery + Temsirolimus | 6  | Everolimus             | DOD           | 104 |
| Tynski <i>et al.</i> [74]               | 2018 | 20 | F | 7.2  | Soft Tissue     | Malignant                     | Synch M+   | NA                    | NA | Brain; Bones               | Surgery                                                                            | -  | CT                     | Dead (Sepsis) | 32  |
| Lattanzi <i>et al.</i> [75]             | 2018 | 38 | M | 6.0  | Kidney          | Malignant                     | Meta M+    | Surgery               | 36 | Local relapse; Renal fossa | Surgery                                                                            | 6  | Surgery > mTOR I       | Alive         | 70  |
| Alnajjar <i>et al.</i> [76]             | 2018 | 44 | M | 8.3  | Soft Tissue     | Malignant                     | Synch M+   | NA                    | NA | Lung; Bones                | Knee amputation + palliative RT + Pazopanib                                        | -  | -                      | Alive         | 12  |
| Shan <i>et al.</i> [77]                 | 2018 | 27 | F | 6.2  | Uterus          | -                             | Meta M+    | Surgery               | 4  | LN                         | Surgery + CT (ICE)                                                                 | 10 | -                      | DOD           | 14  |
| AlAzab <i>et al.</i> [78]               | 2019 | 39 | M | 7.0  | Kidney          | Malignant                     | Synch M+   | NA                    | NA | Lung; LN                   | Surgery + Sunitinib                                                                | 9  | Everolimus > Sunitinib | DOD           | 24  |
| Szumera-Cieaekiewicz <i>et al.</i> [79] | 2019 | 61 | F | 10.0 | Retroperitoneum | Malignant                     | Synch M+   | NA                    | NA | LN; Peritoneum             | Palliative surgery + Sirolimus                                                     | -  | -                      | -             | 2   |
| Gondran <i>et al.</i> [80]              | 2019 | 17 | M | 5.5  | GI              | Uncertain malignant potential | LA         | Sirolimus             | NA | Local relapse              | -                                                                                  | -  | -                      | Alive         | 42  |
| Liu <i>et al.</i> [81]                  | 2019 | 51 | F | 8.3  | Vagina          | Malignant                     | LA         | Surgery + RT + mTOR I | NA | NA                         | NA                                                                                 | CR | NA                     | Alive         | 7   |
| Liu <i>et al.</i> [81]                  | 2019 | 80 | F | 10.0 | Uterus          | -                             | LA relapse | Surgery               | 1  | Local relapse              | Surgery + RT + mTOR I                                                              | CR | NA                     | Alive         | 48  |



|                                |      |    |   |      |                 |           |            |                   |    |                          |                               |    |                       |       |     |
|--------------------------------|------|----|---|------|-----------------|-----------|------------|-------------------|----|--------------------------|-------------------------------|----|-----------------------|-------|-----|
| Liu <i>et al.</i> [81]         | 2019 | 71 | F | 14.0 | Broad ligament  | -         | Synch M+   | NA                | NA | Peritoneum               | Surgery                       | 4  | mTOR I                | DOD   | 12  |
| Yang <i>et al.</i> [82]        | 2020 | 55 | M | 20.5 | Retroperitoneum | Malignant | Meta M+    | Surgery           | 10 | Kidney                   | Surgery + CT (T+ Bevacizumab) | 12 | -                     | DOD   | 48  |
| Gupta <i>et al.</i> [83]       | 2020 | 65 | F | 6.0  | Vagina          | Malignant | Synch M+   | NA                | NA | LN; Liver                | RT-CT                         | -  | -                     | -     | -   |
| Xu <i>et al.</i> [84]          | 2020 | 31 | F | 25.0 | Soft Tissue     | Malignant | Synch M+   | NA                | NA | LN; Liver; Adrenal gland | Surgery + Everolimus          | 3  | Apatinib > Everolimus | DOD   | 18  |
| Torres Luna <i>et al.</i> [85] | 2020 | 32 | M | 20.0 | Kidney          | Malignant | Synch M+   | NA                | NA | Liver                    | Hepatectomy                   | CR | NA                    | -     | 3   |
| Wu <i>et al.</i> [99]          | 2020 | 37 | F | 6.0  | Bladder         | Malignant | Meta M+    | Surgery           | 13 | -                        | -                             | -  | -                     | Alive | 40  |
| Wu <i>et al.</i> [99]          | 2020 | 31 | F | 5.5  | Bladder         | Malignant | Meta M+    | Surgery           | 10 | -                        | -                             | 20 | -                     | DOD   | 30  |
| Jia <i>et al.</i> [100]        | 2020 | 35 | F | 7.0  | Retroperitoneum | Malignant | Meta M+    | Surgery + Ivermos | 9  | Local relapse            | -                             | -  | -                     | DOD   | 18  |
| Jia <i>et al.</i> [100]        | 2020 | 25 | F | 25.0 | Retroperitoneum | -         | LA relapse | Surgery           | -  | Local relapse            | Surgery                       | CR | NA                    | Alive | 20  |
| Jia <i>et al.</i> [100]        | 2020 | 35 | F | 8.0  | Pelvic wall     | -         | Synch M+   | NA                | NA | -                        | Palliative RT + CT            | -  | Ivermos > mTOR I      | DOD   | 33  |
| Jia <i>et al.</i> [100]        | 2020 | 35 | F | 8.0  | Kidney          | Malignant | Meta M+    | Surgery           | -  | Local relapse            | Surgery                       | -  | Surgery               | DOD   | 126 |
| Jia <i>et al.</i> [100]        | 2020 | 45 | M | 14.0 | Kidney          | -         | LA relapse | Surgery           | -  | Local relapse            | Surgery                       | CR | NA                    | Alive | 29  |
| Jia <i>et al.</i> [100]        | 2020 | 25 | M | 16.7 | Kidney          | -         | Meta M+    | Surgery           | -  | Lung                     | Surgery                       | CR | NA                    | Alive | 45  |
| Jia <i>et al.</i> [100]        | 2020 | 35 | F | 14.0 | Liver           | Malignant | Synch M+   | NA                | NA | Liver                    | Surgery                       | -  | Surgery + Sirolimus   | Alive | 151 |
| Jia <i>et al.</i> [100]        | 2020 | 35 | F | 13.0 | Pelvic wall     | -         | LA relapse | Surgery           | -  | Local relapse            | Sirolimus                     | -  | -                     | Alive | 64  |
| Uhlenhopp <i>et al.</i> [86]   | 2020 | 64 | F | 15.2 | GI              | Malignant | Synch M+   | NA                | NA | Liver                    | Surgery + Sirolimus           | 8  | Pazopanib > mTOR I    | DOD   | 22  |

|                              |      |    |   |      |                 |           |            |         |    |               |                                                |   |                          |       |     |
|------------------------------|------|----|---|------|-----------------|-----------|------------|---------|----|---------------|------------------------------------------------|---|--------------------------|-------|-----|
| Fabbroni <i>et al.</i> [87]  | 2020 | 61 | F | 11.0 | Retroperitoneum | Malignant | Meta M+    | Surgery | 24 | Lung          | Gemcitabine                                    | 3 | mTOR I                   | Alive | 108 |
| Liapi <i>et al.</i> [88]     | 2021 | 53 | F | 6.0  | Uterus          | Malignant | Synch M+   | NA      | NA | Bones         | Surgery + stereotaxic RT                       | 3 | Everolimus > Pazopanib   | Alive | 39  |
| Zhong <i>et al.</i> [89]     | 2021 | 33 | F | 11.8 | Bones           | Malignant | Synch M+   | NA      | NA | Bones         | Neoadjuvant CT (AI) + surgery of primary tumor | 5 | Apatinib + Camrelizumab  | Alive | 23  |
| Gu <i>et al.</i> [103]       | 2021 | -  | F | -    | Uterus          | -         | LA relapse | Surgery | 48 | Local relapse | Surgery + CT (ICE)                             | 4 | BSC                      | Alive | 55  |
| Gu <i>et al.</i> [103]       | 2021 | -  | F | -    | Uterus          | -         | Meta M+    | Surgery | 12 | -             | Surgery + CT (ICE)                             | 3 | BSC                      | DOD   | 16  |
| Kopparthy <i>et al.</i> [90] | 2021 | 58 | F | 7.0  | Uterus          | -         | Meta M+    | Surgery | 6  | Lung          | Everolimus                                     | 2 | Brain RT + Nab-sirolimus | Alive | 11  |

Abbreviations: Anthra : Anthracyclines; AI: Anthracycline and Ifosfamide; BSC: Best supportive care; CR: Complete response without any relapse report; CT : Chemotherapy; cy = cycles; DOD: Death of disease; F: Female; fr: fractions; Gem : Gemcitabine; GI: Gastrointestinal; HD-I : High Dose Ifosfamide; ICE: Ifosfamide, Platin (Cisplatin or Carboplatin) and Anthracycline; IVA: Ifosfamide, Vincristine and Anthracycline; LA: Locally Advanced; LN: Lymph Nodes; M: Male; Meta M+ : Metachronous metastasis; mos : months; mTOR I: mTOR inhibitor; NA: Not applicable; RT: Radiotherapy; RT-CT : concomitant radiotherapy and chemotherapy; Synch M+ : Synchronous metastasis; T: Taxane; yrs: years; - : missing data; > : follow by.
